# Supplementary material
Source: HighWire-hosted journal article supplement (https://thorax.bmj.com/highwire/filestream/173980/field_highwire_adjunct_files/0/Thorax_Table_151621.docx)
Supplement: Thorax_Table_151621.docx [file Thorax_Table_151621.docx]

**SUPPLEMENTAL TABLE, ONLINE ONLY:**

1-and 5-year relative survival (1988-2007) stratified by sex

|  | 1-year relative survival  (95% CI) | 1-year relative survival  (95% CI) | 5-year relative survival  (95% CI) | 5-year relative  survival  (95% CI) |
| --- | --- | --- | --- | --- |
|  | **Males** | **Females** | **Males** | **Females** |
| **HISTOLOGY** |  |  |  |  |
| Adenocarcinoma | 33.7  (32.4-34.9) | 44.1  (42.6-45.6) | 11.3  (10.4-12.2) | 18.1  (16.8-19.5) |
| Squamous cell carcinoma | 40.8  (39.6-42) | 40.6  (38.5-42.8) | 13.8  (12.9-14.8) | 16.6  (14.9-18.4) |
| Large cell carcinoma | 28.2  (25.6-30.8) | 33  (29.3-36.8) | 10.1  (8.2-12.1) | 13.7  (10.9-16.7) |
| Small cell carcinoma | 24.5  (23.2-25.8) | 29.7  (28-31.4) | 3.7  (3.1-4.4) | 5.4  (4.6-6.4) |
| NOS | 24.2  (22.8-25.7) | 29.1  (27.1-31.1) | 5.1  4.2-6) | 7.1  (5.9-8.5) |
| **STAGE** |  |  |  |  |
| Localized disease | 52.7  51.3-54) | 64.6  (62.8-66.5) | 23.8  (22.5-25.1) | 37.1  (35-39.2) |
| Regional disease | 42.8  (41.6-44.1) | 47.8  (46.1-50) | 11.1  (10.2-12.1) | 14.3  (12.9-15.7) |
| Metastatic disease | 12.2  (11.6-12-8) | 16.3  (15.3-17.2) | 1  (0.8-1.2) | 1.9  (1.5-2.3) |
| Unknown | 31.9  (30.1-33.8) | 38 (  35.5-40.4) | 8.1  (6.9-9.4) | 12.3  (10.4-14.3) |
| **AGE (yrs)** |  |  |  |  |
| 0-49 | 44.3  (41.3-47.2) | 48.2  (44.9-51.5) | 19.4  (17-21.8) | 23.6  (20.8-26.6) |
| 50-59 | 37.9  36.3-39.5) | 42.7  (40.7-44.6) | 13.9  (12.7-15.2) | 17.1  (15.5-18.7) |
| 60-69 | 34  (32.9-35.1) | 40.5  (39-42) | 10.5  (9.7-11.3) | 14.4  (13.2-15.6) |
| 70-79 | 28.1  (27.1-29) | 31.4  (30-32.8) | 7.4  (6.8-8.1) | 10.3  (9.3-11-4) |
| 80 and older | 19.5  (18.1-20.9) | 21.6  (19.5-23.6) | 2.8  (2.1-3.9) | 5.8  (4.3-7.6) |
